# Supplementary material for: Transient Elastography Is the Best-Performing Non-Invasive Test of Liver Fibrosis in Obese Asian Patients with Non-Alcoholic Fatty Liver Disease: A Pilot, Cross-Sectional Study
Source: MDPI journal article supplement (doi:10.3390/medicina60010169), 2024-01-17
Supplement: s1 [file s1]

## Supplementary Index 1

1. FIB4 (Fibrosis 4 Index) = aspartate aminotransferase (AST) (U/L) × age (years)/platelet count ( $10^9$  /L) × alanine aminotransferase (ALT) (U/L)  $^{1/2}$  (25)
2. APRI (AST to platelet ratio index): (AST [IU/L]/upper limit of normal AST [U/L]) × 100/platelet count ( $10^9$ /L) (25)
3. BARD index Scale 0-4: BMI  $\geq 28$  kg/m<sup>2</sup> = 1 point AST/ALT  $\geq 0.8$  = 2 points Diabetes = 1 point(21)
4. Asia pacific NAFLD Advanced fibrosis score: Score 0, low risk; score 1-2, moderate risk; score 3-4, high risk(8)

### Asia Pacific NAFLD advanced fibrosis score

| Risk factor       | Criteria                  | Points |
|-------------------|---------------------------|--------|
| Age               | <55years                  | 0      |
|                   | $\geq 55$ years           | 2      |
| Diabetes Mellitus | Absent                    | 0      |
|                   | Present                   | 1      |
| Platelet          | $\geq 150 \times 10^9$ /L | 0      |
|                   | $< 150 \times 10^9$ /L    | 1      |

| NITs(Non invasive tests)                        | Cut-Off Value (for diagnosis of advanced fibrosis) |
|-------------------------------------------------|----------------------------------------------------|
| <b>Biomarkers</b>                               |                                                    |
| APRI                                            | 1                                                  |
| FIB4 Index                                      | 3.25                                               |
| BARD                                            | 2                                                  |
| AAR                                             | 0.8                                                |
| Asia–Pacific NAFLD advanced fibrosis risk score | 3                                                  |
| <b>Imaging indices</b>                          |                                                    |
| SWE                                             | 8.9                                                |
| TE                                              | 8.5                                                |
